# 1 **Cross-neutralization of SARS-CoV-2 by HIV-1 specific broadly neutralizing antibodies and** 2 **polyclonal plasma**

3 Nitesh Mishra<sup>1</sup>, Sanjeev Kumar<sup>1,2</sup>, Swarandeeep Singh<sup>1</sup>, Tanu Bansal<sup>1</sup>, Nishkarsh Jain<sup>1</sup>, Sumedha  
4 Saluja<sup>1</sup>, Jayanth Kumar Palanichamy<sup>1</sup>, Riyaz A. Mir<sup>1</sup>, Subrata Sinha<sup>1</sup>, Kalpana Luthra<sup>1\*</sup>.

5 <sup>1</sup>Department of Biochemistry, All India Institute of Medical Sciences, New Delhi, India – 110029.

6 <sup>2</sup>Current address – ICGEB-Emory Vaccine Centre, International Centre for Genetic Engineering and  
7 Biotechnology, New Delhi - 110067, India.

8 \*Correspondence – Kalpana Luthra (kalpanaluthra@gmail.com)

## 9 **Abstract**

10 Cross-reactive epitopes (CREs) are similar epitopes on viruses that are recognized or neutralized by  
11 same antibodies. The S protein of SARS-CoV-2, similar to type I fusion proteins of viruses such as HIV-  
12 1 envelope (Env) and influenza hemagglutinin, is heavily glycosylated. Viral Env glycans, though host  
13 derived, are distinctly processed and thereby recognized or accommodated during antibody responses.  
14 In recent years, highly potent and/or broadly neutralizing human monoclonal antibodies (bnAbs) that  
15 are generated in chronic HIV-1 infections have been defined. These bnAbs exhibit atypical features  
16 such as extensive somatic hypermutations, long complementary determining region (CDR) lengths,  
17 tyrosine sulfation and presence of insertions/deletions, enabling them to effectively neutralize diverse  
18 HIV-1 viruses despite extensive variations within the core epitopes they recognize. As some of the HIV-  
19 1 bnAbs have evolved to recognize the dense viral glycans and cross-reactive epitopes (CREs), we  
20 assessed if these bnAbs cross-react with SARS-CoV-2. Several HIV-1 bnAbs showed cross-reactivity  
21 with SARS-CoV-2 while one HIV-1 CD4 binding site bnAb, N6, neutralized SARS-CoV-2. Furthermore,  
22 neutralizing plasma antibodies of chronically HIV-1 infected children showed cross neutralizing activity  
23 against SARS-CoV-2. Collectively, our observations suggest that human monoclonal antibodies  
24 tolerating extensive epitope variability can be leveraged to neutralize pathogens with related antigenic  
25 profile.

## 26 **Importance**

27 In the current ongoing COVID-19 pandemic, neutralizing antibodies have been shown to be a critical  
28 feature of recovered patients. HIV-1 bnAbs recognize extensively diverse cross-reactive epitopes and  
29 tolerate diversity within their core epitope. Given the unique nature of HIV-1 bnAbs and their ability to  
30 recognize and/or accommodate viral glycans, we reasoned that the glycan shield of SARS-CoV-2 spike  
31 protein can be targeted by HIV-1 specific bnAbs. Herein, we showed that HIV-1 specific antibodies  
32 cross-react and neutralize SARS-CoV-2. Understanding cross-reactive neutralization epitopes of  
33 antibodies generated in divergent viral infections will provide key evidence for engineering so called  
34 super-antibodies (antibodies that can potently neutralize diverse pathogens with similar antigenic  
35 features). Such cross-reactive antibodies can provide a blueprint upon which synthetic variants can be  
36 generated in the face of future pandemics.

## 37 Introduction

38 Broadly neutralizing antibodies (bnAbs) targeting the HIV-1 envelope glycoprotein (Env) can neutralize  
39 a broad range of circulating HIV-1 isolates and have been called super-antibodies due to their  
40 remarkable potency and neutralization breadth (1). As a result of its extensive genetic diversity, HIV-1  
41 is subdivided in multiple clades and circulating recombinant forms (CRFs). A rare subset of HIV-1  
42 infected individuals develops broad and potent antibody responses and have served as potential  
43 candidates for the isolation of HIV-1 bnAbs (2, 3). HIV-1 bnAbs take years to develop, have atypical  
44 features including long complementarity-determining regions (CDR) loops, high levels of somatic  
45 hypermutations (SHMs), presence of insertions and/or deletions (indels), tyrosine sulfation, and develop  
46 to tolerate significant alterations in their core epitope (1–3). Notably, V2-apex bnAbs have been shown  
47 to exhibit cross-group neutralization activity with viruses derived from HIV-1 group M, N, O and P Envs.  
48 Furthermore, they even show cross-neutralization of simian immunodeficiency virus (SIV) isolates (4).

49 Severe acute respiratory syndrome coronavirus 2 (SARS-CoV-2) emerged in late 2019, rapidly spread  
50 across different countries, infecting millions of individuals and has caused a global COVID-19 pandemic  
51 (5). The SARS-CoV-2 trimeric spike glycoprotein (S) binds to angiotensin-converting enzyme 2 (ACE2)  
52 which leads to host cell entry and fusion (6, 7). Type 1 viral fusion machines, including HIV-1 Env,  
53 Influenza hemagglutinin (HA), and SARS-CoV-2 S protein, mediate viral entry driven by structural  
54 rearrangements and are trimeric in their pre-fusion and post-fusion state (2, 7, 8). SARS-CoV-2 S  
55 protein is covered by host-derived glycans on 66 PNGS on each trimer and site-specific glycan analysis  
56 has shown that 28% of glycans on the protein surface are underprocessed oligomannose-type glycans  
57 (9). SARS-CoV and HCoV OC43 elicited antibodies have been shown to cross-react with SARS-CoV-  
58 2. The Neutralizing antibody (nAb), S309, isolated from memory B-cells of a SARS-CoV infected  
59 individual targets a glycan epitope conserved within the Sarbecovirus subgenus (10). Several HIV-1  
60 bnAbs have been shown to penetrate the glycan shield and contact protein residues in Env via their  
61 long complementary determining region (CDR) loops and make stabilizing contacts with the  
62 surrounding high mannose and complex glycans (11, 12). Several HIV-1 bnAbs recognize  
63 glycopeptides and/or cluster of N-linked glycans (1–3). The glycans on HIV-1 Env are highly dynamic  
64 and can be occupied by different glycoforms due to glycan processing. The glycan shield covering the  
65 HIV-1 Env comprises roughly half its mass and shields approximately 70% of the protein surface with  
66 glycosylation occurring on potential N-linked glycosylation sites that vary significantly between infected  
67 individuals (18 – 33 PNGS) (13, 14).

68 Herein, we reasoned that given the unique nature of HIV-1 bnAbs and their ability to recognize and/or  
69 accommodate viral glycans, the glycan shield of SARS-CoV-2 spike protein can be targeted by HIV-1  
70 specific bnAbs.

## 71 Results and Discussion

72 In the past decade, a large panel of bnAbs and non-nAbs targeting diverse epitopes on the HIV-1 Env  
73 glycoprotein have been isolated and extensively characterized (reviewed in refs (1–3)). To evaluate the  
74 potential cross-reactivity of these antibodies, we first performed binding ELISA of 30 bnAbs and 7 non-

75 nAbs with SARS-CoV-2 S2P<sub>ecto</sub> protein (pre-fusion stabilized ectodomain construct, 1 – 1208 amino  
 76 acid residues) and receptor-binding domain (RBD, residues 319 – 541, also called S1<sup>B</sup> domain). The  
 77 HIV-1 bnAbs were categorized into five categories based on their epitopes on the viral Env (**figure 1A**).  
 78 CR3022, a nAb isolated from a convalescent SARS-CoV patient (15), which has been shown to cross-  
 79 react with SARS-CoV-2 (7), was used as positive control while two antibodies targeting the envelope  
 80 glycoprotein of simian immunodeficiency virus were used as negative control. Of the 30 HIV-1 bnAbs  
 81 tested for binding to both S2P<sub>ecto</sub> protein and RBD of SARS-CoV-2, 6 bnAbs (VRC07.523LS, NIH45-46  
 82 G54W, N6, Z13e1, 2F5 and 4E10) showed significant binding, while one bnAb (CAP256.09) showed  
 83 moderate binding to only the S2P<sub>ecto</sub> protein (**figure 1A**). Non-nAbs that target post-fusion and/or open  
 84 trimeric conformation of HIV-1 Env were unable to bind both SARS-CoV-2 S2P<sub>ecto</sub> protein and RBD  
 85 protein (**figure 1B**), suggesting that only pre-fusion state specific antibodies that evolve via extensive  
 86 somatic hypermutation and affinity maturation in response to repeated exposure to a continuously  
 87 evolving antigen can cross react with other viruses.

88

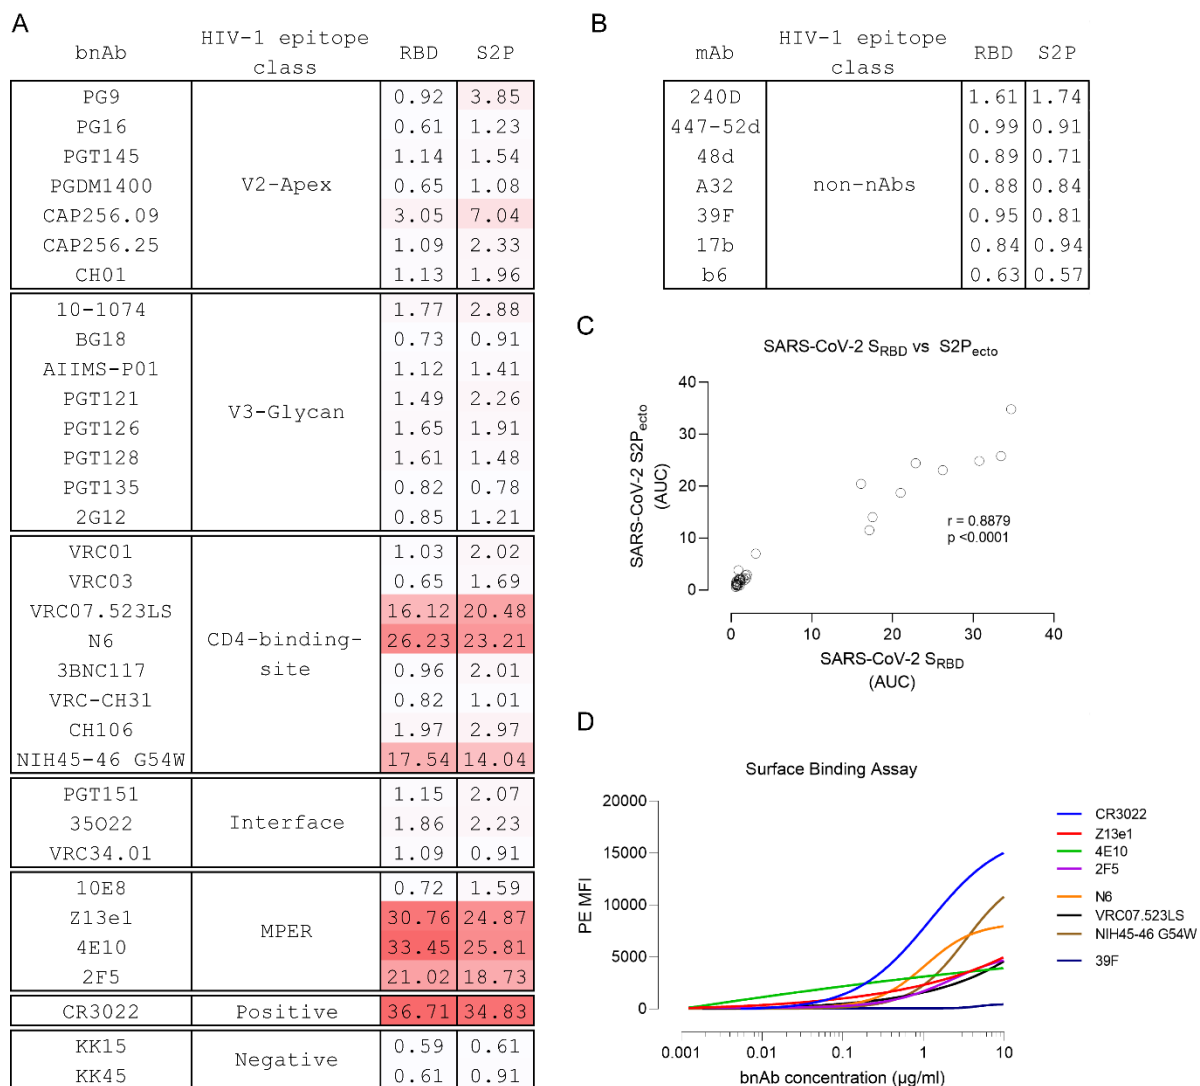

89

90 **Figure 1 – HIV-1 bnAbs cross-react with the receptor binding domain of SARS-CoV-2.** (A – B) Cross-reactivity  
 91 of anti-HIV-1 broadly neutralizing antibodies targeting diverse epitopes on HIV-1 Env and non-neutralizing

92 antibodies were assessed by ELISA using SARS-CoV-2<sub>RBD</sub> and SARS-CoV-2 S2P<sub>ecto</sub>. CR3022, a SARS-CoV  
93 neutralizing antibody, was used as positive control. Two antibodies targeting SIV Env were used as negative  
94 control. Area under curve (AUC) of OD<sub>450</sub> values of a 12-point binding curve (range, 0.0048 to 10 µg/ml) from three  
95 independent experiments are shown. (C) Two-tailed Spearman's correlation was calculated using the area under  
96 curve (AUC) values. A significant positive correlation was observed between RBD and S2P<sub>ecto</sub> (spearman  $r =$   
97 0.8879,  $p < 0.0001$ ). (D) Binding of HIV-1 bnAbs that showed cross-reactivity to S2P and RBD domain of SARS-  
98 CoV-2 in ELISA to full-length SARS-CoV-2 S glycoprotein expressed on the surface of HEK293T cells. Average  
99 median fluorescence intensity values of a 12-point binding curve (range, 0.0048 to 10 µg/ml) from three  
100 independent experiments were used to draw the curve. CR3022, a SARS-CoV neutralizing antibody, was used as  
101 positive control.

102 Though reactivity against RBD was stronger than S2P<sub>ecto</sub> protein for majority of the bnAbs tested, a  
103 significant positive correlation was seen between binding to S2P<sub>ecto</sub> protein and RBD (**Figure 1C**). All  
104 the 6 bnAbs that showed binding reactivity in ELISA exhibited a similar binding profile to the cell surface  
105 expressed SARS-CoV-2 S glycoprotein (**figure 1D**). Of the 30 monoclonal antibodies tested herein,  
106 bnAbs targeting the membrane proximal external region (MPER) of HIV-1 showed maximum binding to  
107 both the S protein and RBD with half-maximal effective concentration (EC<sub>50</sub>) of 0.71 µg/ml and 1.71  
108 µg/ml (Z13e1), 0.048 µg/ml and 2.91 µg/ml (2F5) and 0.79 and 0.33 µg/ml (4E10) µg/ml to the RBD  
109 and S2P<sub>ecto</sub> respectively. VRC07.523LS is an engineered variant of the VRC01 bnAb with higher SHM  
110 (16) and while it showed binding to both S2P<sub>ecto</sub> protein and RBD, both VRC01 and its somatic related  
111 clone VRC03 did not show any binding (**figure 2A – B**).

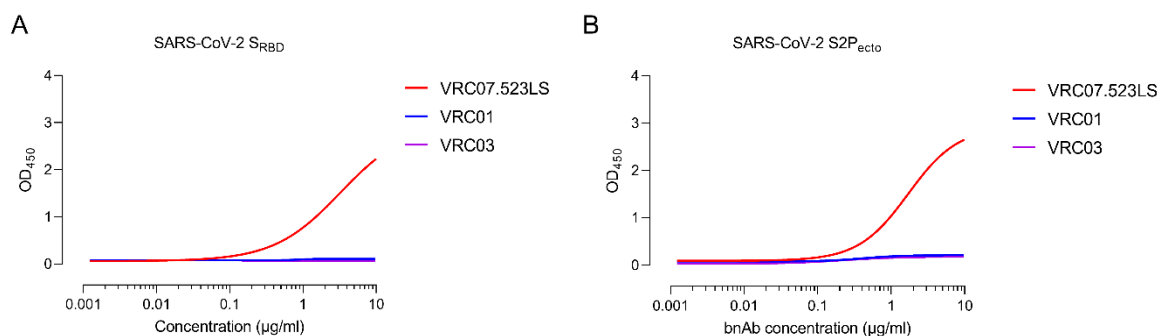

112

113 **Figure 2 – Somaticly engineered VRC07.523LS cross-reacts with SARS-CoV-2.** Cross-reactivity of anti-HIV-  
114 1 broadly neutralizing antibodies, VRC07.523LS, VRC01 and VRC03, targeting the CD4-binding site on HIV-1 Env.  
115 Cross-reactivity was assessed by ELISA using (a) SARS-CoV-2<sub>RBD</sub> and (b) SARS-CoV-2 S2P<sub>ecto</sub>. OD<sub>450</sub>, optical  
116 density at 450 nm. OD<sub>450</sub> values are from a 12-point binding curve (range, 0.0048 to 10 µg/ml).

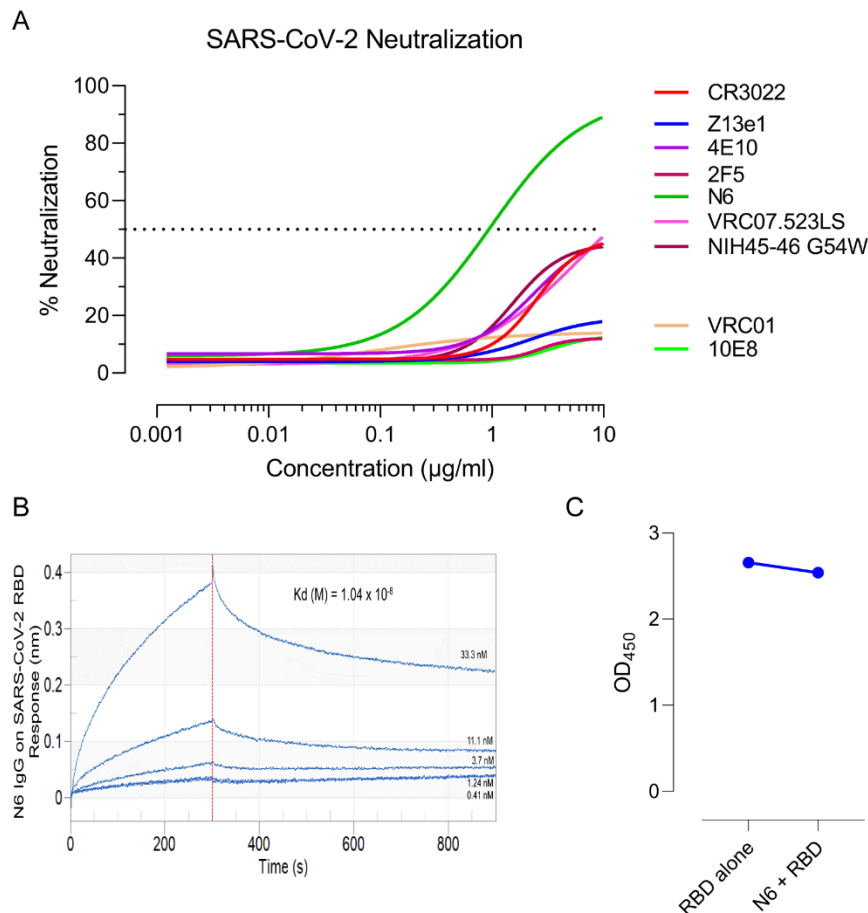

117

118 **Figure 3 – Neutralization of SARS-CoV-2 by HIV-1 bnAbs.** (A) The bnAbs were tested for neutralization of  
119 pseudotyped SARS-CoV-2 virions. Percent neutralization was calculated by assessing relative luminescence units  
120 (RLU) in cell lysates of HEK293T-ACE2 cells 48 hours after infection with SARS-CoV-2 pseudoviruses in the  
121 presence of increasing amounts of bnAbs (range, 0.0048 to 10  $\mu\text{g/ml}$ ). N6, an anti-HIV-1 CD4-binding site bnAb,  
122 showed cross-neutralization of SARS-CoV-2. Dotted line corresponds to 50% neutralization. Graphs were plotted  
123 using average values (percent neutralization) from three independent experiments. (B) Affinity of N6 against SARS-  
124 CoV-2 RBD was measured using biolayer interferometry. (C) Competition ELISA was performed for RBD binding  
125 to ACE2 in presence and absence of N6. Average  $OD_{450}$  value from three independent experiments are shown.

126 All 6 HIV-1 bnAbs that showed binding to SARS-CoV-2 S protein and RBD were then tested for their  
127 ability to block infection using a HIV-1 pseudovirus based neutralization assay utilizing SARS-CoV-2  
128 spike protein. VSV-G and MLV pseudotyped viruses were used as negative control. Except N6, all  
129 remaining five bnAbs failed to neutralize SARS-CoV-2 (**figure 3A**). Though N6 showed neutralization  
130 of SARS-CoV-2, it failed to show complete neutralization (maximum percent neutralization of 88% with  
131 an  $IC_{50}$  of 0.988  $\mu\text{g/ml}$ ) and had a moderate affinity of  $1.04 \times 10^8$  M (**figure 3B**). Furthermore, N6 failed  
132 to block RBD binding to soluble ACE2 by ELISA (**figure 3C**), suggesting it recognizes an epitope on  
133 RBD outside the ACE2 binding site. It is noteworthy that N6 is a member of the VRC01 class of  
134 antibodies that target the CD4bs of HIV-1; it recognizes HIV-1 in an unusual orientation and neutralizes  
135 HIV-1 isolates that are typically resistant to other VRC01 class bnAbs (17). Furthermore, it can tolerate  
136 absence of key CD4bs antibody contact residues across the length of heavy chain and can tolerate  
137 escape mutations that typically provide resistance to HIV-1 from other CD4bs bnAbs. Of note, N6 has  
138 an unprecedented degree of somatic hypermutation (31% in heavy and 25% in light chain at the  
139 nucleotide level).

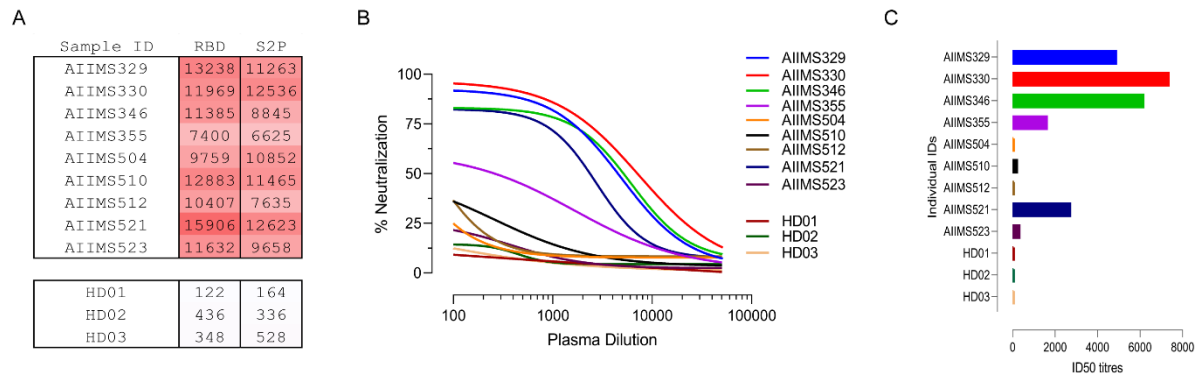

140

141 **Figure 4 – Polyclonal plasma of HIV-1 infected children neutralizes SARS-CoV-2.** (A) Cross-reactivity of anti-  
 142 HIV-1 neutralizing plasma antibodies from ten children with chronic HIV-1 infection against SARS-CoV-2<sub>RBD</sub> and  
 143 SARS-CoV-2 S2P<sub>ecto</sub> was assessed by ELISA. Plasma antibodies from three seronegative healthy donors were  
 144 used as negative control. Area under the curve (AUC) of OD<sub>450</sub> values of a 12-point binding curve (range, inverse  
 145 plasma dilution of 100 to 51200), from three independent experiments are shown. (B) Plasma samples were tested  
 146 for their neutralization of pseudotyped SARS-CoV-2 virions. Percent neutralization was calculated by assessing  
 147 relative luminescence units (RLU) in cell lysates of HEK293T-ACE2 cells 48 hours after infection with SARS-CoV-  
 148 2 pseudoviruses in the presence of increasing dilution of plasma samples (range, inverse plasma dilution of 100 to  
 149 51200). (C) Respective ID<sub>50</sub> (50% inhibitory dilution) for plasma from all ten children are shown.

150 We next tested plasma antibodies of children with chronic HIV-1 infection for their ability to bind SARS-  
 151 CoV-2 S2P<sub>ecto</sub> protein and RBD. Ten children that had shown potent neutralization titre against a 12-  
 152 virus global panel of HIV-1 isolates from previous studies in our lab were selected (18–20). While all  
 153 ten children showed significant binding to both S2P<sub>ecto</sub> and RBD (**figure 4A**), three children showed  
 154 potent and near-complete neutralization of SARS-CoV-2 pseudoviruses (AIIMS329, AIIMS330,  
 155 AIIMS346) while two children (AIIMS355 and AIIMS521) showed moderate neutralization of SARS-  
 156 CoV-2 (**figure 4B – C**). Collectively, our findings highlight the ability of HIV-1 specific bnAbs and  
 157 polyclonal plasma to cross-react with the newly emerged SARS-CoV-2.

158 Neutralizing antibodies engage the host immune system to clear the pathogen or infected cells and are  
 159 promising candidates for combating emerging viruses (21–23). The RBD of coronaviruses are highly  
 160 immunogenic and infected individuals typically mount a nAb response (10, 24–28). Given that several  
 161 HIV-1 bnAbs showed cross-reactivity with RBD of both SARS-CoV and SARS-CoV-2, vaccine efforts  
 162 should focus inducing antibodies targeting the cross-reactive epitopes on RBD. Most HIV-1 vaccine  
 163 candidates are in the stage where they typically induce tier 1B or 2 responses against autologous and  
 164 heterologous viruses in rabbits and non-human primates (29–31). A germline targeting HIV-1 candidate  
 165 immunogen (eOD-GT8) which was designed to prime VRC01 class CD4bs directed antibodies has  
 166 been described and the frequencies and affinity of B cells from healthy HIV-1 uninfected individuals  
 167 recognizing this germline-targeting immunogen showed its suitability as a candidate human vaccine  
 168 prime (32, 33). Naive B-cells that recognised eOD-GT8 had L-CDR3 sequences that matched several  
 169 VRC01 class bnAbs, suggesting B-cells with light chain sequences for VRC01 class exist at high  
 170 frequency. Based on the above observations and the availability of sera from these immunized animals,  
 171 and findings herein of the ability of HIV-1 CD4bs directed bnAbs to inhibit SARS-CoV and SARS-CoV-  
 172 2 pseudovirus infection, it is pertinent that the immune sera be tested for binding and neutralization of  
 173 SARS-CoV-2. Furthermore, detailed structural studies should be taken with N6 to identify its epitope

174 and neutralization determinants, which can be used to engineer its variants as effective SARS-CoV-2  
175 therapeutics.

176 Understanding cross-reactive neutralization epitopes of antibodies generated in divergent viral  
177 infections can provide key evidence for engineering so called super-antibodies (antibodies that can  
178 potently neutralize diverse pathogens with similar antigenic features). Such cross-reactive antibodies  
179 can provide a blueprint upon which synthetic variants can be generated in the face of future pandemics.

## 180 **Methods**

### 181 **Study design**

182 The current study was designed to assess the cross-reactivity of HIV-1 broadly neutralizing antibodies  
183 and plasma antibodies from children with chronic HIV-1 infection against the SARS-CoV-2. The study  
184 was approved by the institute ethics committee of All India Institute of Medical Sciences (IEC/NP-  
185 295/2011 & IEC/59/08.01.16).

### 186 **Cell lines**

187 HEK293T cells for pseudovirus production and generation of 293T-ACE2 cells, and TZM-bl cells for  
188 HIV-1 pseudovirus neutralization assay were maintained at 37°C in 5% CO<sub>2</sub> DMEM containing 10%  
189 heat-inactivated FBS (vol/vol), 10mM HEPES, 1mM sodium pyruvate, and 100 U ml<sup>-1</sup>  
190 penicillin/streptomycin. Expi293F cells for recombinant antigen and monoclonal antibody production  
191 (Thermo Fisher Scientific, A1452) were maintained at 37°C in 8% CO<sub>2</sub> in Expi293F expression medium  
192 (Thermo Fisher Scientific, A1435102).

### 193 **Plasmids**

194 phCMV3 expression plasmids encoding the soluble S2P ectodomain of SARS-CoV (residue 1 – 1190),  
195 SARS-CoV-2 (residue 1 – 1208), RBD domain of SARS-CoV (residue 319 – 513) and SARS-CoV-2  
196 RBD (residue 332 – 527) were kindly gifted by Dr. Raiees Andrabi (The Scripps Research Institute).  
197 pCR3 expression vectors encoding truncated version of SARS-CoV S protein (residue 1 – 1236) and  
198 SARS-CoV-2 S protein (residue 1 – 1254), and pNL4-3ΔEnv-nanoluc were kindly gifted Dr. Paul  
199 Bieniasz (The Rockefeller University). CR3022 fab heavy (GenBank: DQ168569.1) and light (GenBank:  
200 DQ168570.1) chains were synthesized commercially and subcloned in phCMV3.

### 201 **Bacteria**

202 *E. coli* DH5α, DH10β and STBL3 for propagation of plasmids were cultured at 37°C (30°C for STBL3)  
203 in LB broth (Sigma-Aldrich) with shaking at 220 rpm.

### 204 **Plasma from children with chronic HIV-1 infection**

205 Well-characterized plasma sample from ten children that had shown potent neutralization titre against  
206 a 12-virus global panel of HIV-1 isolates from previous studies in our lab were selected.

### 207 **Recombinant protein production and purification**

208 SARS-CoV and SARS-CoV-2 ectodomain and RBD constructs were transiently transfected in Expi293F  
209 cells at a density of 2 million cells/mL using polyethylenimine and expression plasmids at a molar ratio  
210 of 3:1 and purified from clarified transfected culture supernatants 4-days post-transfection using Ni<sup>2+</sup>-  
211 NTA affinity chromatography (GE Life Sciences). Proteins were eluted from the column using 250  
212 mmol/L imidazole, dialyzed into phosphate buffered saline (PBS), pH 7.2 and concentrated using  
213 Amicon 10-kDa (RBD) and 100-kDa (S2P<sub>ecto</sub>) Amicon ultra-15 centrifugal filter units (EMD Millipore).  
214 Protein concentration was determined by the Nanodrop method using the protein molecular weight and  
215 molar extinction coefficient as determined by the online ExPASy software (ProtParam).

#### 216 **Antibody production and purification**

217 The HIV-1 monoclonal antibodies (PGT145, CAP256.25, VRC01, 10-1074, BG18, AIIIMS-P01, and  
218 PGT151) were expressed by co-transfection of heavy chain and light chain IgG1 plasmids (1:1 molar  
219 ratio) in Expi293F cells at a density of 0.8 – 1.2 million cells/mL using PEI-Max (1:3 molar ratio) as the  
220 transfection reagent. Five days post-transfection, antibodies were purified from clarified supernatants  
221 using protein A beads, eluted with IgG elution buffer and concentrated using 10-kDa Amicon ultra-15  
222 centrifugal filter units (EMD Millipore).

#### 223 **Binding ELISA**

224 96-well microtiter plates were coated overnight with 2 µg/ml of purified SARS-CoV S2P<sub>ectro</sub>, SARS-CoV-  
225 2 S2P<sub>ecto</sub>, SARS-CoV RBD and SARS-CoV-2 RBD. Plates were blocked with 1% BSA for 3 hours.  
226 Monoclonal antibodies were added at a starting concentration of 10 µg/ml, with 11-point titration, and  
227 incubated for 2 hours at room temperature. Horseradish peroxidase conjugated goat anti-human IgG  
228 was used as secondary antibody and TMB substrate was used for color development. Absorbance at  
229 450 nm was measured using a spectrophotometer.

#### 230 **Generation of 293T-ACE2 cells**

231 VSV-G pseudotyped lentiviruses packaging the human ACE2 were generated by co-transfecting the  
232 HEK293T cells with pHAGE6-CMV-ACE2-ZsGreen plasmid and lentiviral helper plasmids (HDM-VSV-  
233 G, HDM-Hgpm2, HDM-Tat and CMV-Rev). 48 hours post-transfection, lentiviruses were harvested and  
234 used to infect HEK293T cells pre-seeded 24-hours in the presence of 10 µg/ml polybrene. 3-days post-  
235 infection, transduced cells were sorted via flow cytometry and maintained as a polyclonal pool of 293T-  
236 ACE2 cells in DMEM containing 10% heat-inactivated FBS (vol/vol), 10mM HEPES, 1mM sodium  
237 pyruvate, and 100 U ml<sup>-1</sup> penicillin/streptomycin at 37°C in 5% CO<sub>2</sub>.

#### 238 **Viruses**

239 To generate HIV-1 based SARS pseudotyped viral stocks, HEK293T cells were co-transfected with  
240 CMV-Luc, RΔ8.2 backbone plasmid, pTMPRSS2 and pSARS-CoV-S<sub>trunc</sub> or pSARS-CoV-2<sub>trunc</sub> using  
241 polyethylenimine. Six hours post-transfection, cells were washed twice with RPMI and fresh media (10%  
242 DMEM) was added. Supernatants containing virions were harvested 48 hours post-transfection, filtered  
243 and stored at -80°C. infectivity of pseudoviruses was determined by titration on 293T-ACE2 cells.



## 244 **Neutralization Assays**

245 SARS-CoV and SARS-CoV-2 S protein were co-transfected with an HIV-1 backbone and helper  
246 plasmid expressing firefly luciferase and serine protease TMPRSS2 (CMV-Luc, R $\Delta$ 8.2 backbone  
247 plasmid, pTMPRSS2) in  $1.25 \times 10^5$  HEK293T cells for 48 hours. Post-transfection, culture supernatants  
248 were harvested, filtered and stored at  $-80^\circ\text{C}$ . For determination of neutralization potential of bnAbs,  
249 eight-point titration curves with 2-fold serial dilution starting at  $10 \mu\text{g/ml}$ , were performed. Serially diluted  
250 bnAbs were mixed with pseudotyped viruses for 1 hour at  $37^\circ\text{C}$ . pseudovirus/bnAb combinations were  
251 then added to 293T-ACE2 cells pre-seeded (24-hours) at 10,000 cells/well. After 48 – 72 hours,  
252 supernatant was removed and luminescence was measured on Tecan luminescence plate reader using  
253 Bright Glow reagent. The percent infectivity was calculated as ratio of relative luminescence units (RLU)  
254 readout in the presence of bnAbs normalized to RLU readout in the absence of mAb. The half maximal  
255 inhibitory concentrations (IC<sub>50</sub>) were determined using 4-parameter logistic regression (GraphPad  
256 Prism version 8.3).

## 257 **Biolayer interferometry analysis of the SARS-CoV-2 RBD binding affinity with N6 bnAb**

258 Biolayer interferometry was performed using an Octet Red96 instrument (ForteBio, Inc.). A  $5 \mu\text{g/ml}$   
259 concentration of SARS-CoV-2 RBD-His was immobilized on a Ni-NTA coated biosensor surface. The  
260 baseline was obtained by measurements taken for 30 s in running buffer (1x PBS, 0.1% BSA and 0.02%  
261 Tween-20), and then, the sensors were subjected to association phase immersion for 300 s in wells  
262 containing N6 bnAb diluted in running buffer. Then, the sensors were immersed in running buffer for  
263 600 s to measure dissociation. Biosensor was then regenerated by dipping it in EDTA followed by nickel  
264 sulfate solution. The mean  $K_{on}$ ,  $K_{off}$  and apparent  $K_D$  values of the SARS-CoV-2 RBD binding affinity  
265 for N6 bnAb were calculated from all the binding curves based on their global fit to a 1:1 Langmuir  
266 binding model.

## 267 **Cell surface binding assay**

268  $1.25 \times 10^5$  HEK293T cells seeded in a 12-well plate were transiently transfected with  $1.25 \mu\text{g}$  of SARS-  
269 CoV-2 S full-length protein using PEI-MAX. 48 hours post-transfection, cells were harvested and per  
270 experimental requirement, distributed in 1.5 ml microcentrifuge tubes. For monoclonal antibody  
271 staining,  $10 \mu\text{g/ml}$  of antibody was used and titrated 2-fold in staining buffer.  $100 \mu\text{l}$  of primary antibody  
272 (HIV-1 specific monoclonals) were added to HEK293T cells expressing SARS-CoV-2 S, and incubated  
273 for 30 minutes at room temperature. After washing,  $100 \mu\text{l}$  of 1:500 diluted PE conjugated mouse anti-  
274 human IgG Fc was added, and after 30-minute incubation, a total of 50,000 cells were acquired on BD  
275 LSRFortessa X20. Data was analyzed using FlowJo software (version v10.6.1).

## 276 **Statistics and Reproducibility**

277 All statistical analyses were performed on GraphPad Prism 8.3. A p-value of  $<0.05$  was considered  
278 significant. Neutralization assays were performed in triplicates and repeated thrice. Average IC<sub>50</sub>  
279 values are shown and used for statistical comparisons. Binding ELISAs were performed in duplicates  
280 and repeated thrice. Average OD<sub>450</sub> values were used for plotting curves. Surface binding assay was

281 performed thrice and average PE-MFI (phycoerythrin-median fluorescence intensity) values were used  
282 for plotting curves.

### 283 **Acknowledgements**

284 We are grateful to Dr. Raiees Andrabi for providing the S2P<sub>ecto</sub> and RBD constructs for SARS-CoV and  
285 SARS-CoV-2, and Dr. Paul Bieniasz for providing the full-length envelope constructs of SARS-CoV,  
286 SARS-CoV-2 and pNL4-3ΔEnv-nanoluc. We are thankful to NIH AIDS Reagent program for providing  
287 HIV-1 envelope pseudovirus plasmids, bnAbs, non-nAbs and their expression plasmids, and TZM-bl  
288 cells, and Neutralizing Antibody Consortium (NAC), IAVI, USA for providing bnAbs. We are thankful to  
289 Dr. Michel Nussenzweig for providing 10-1074 and BG18 bnAb expression plasmids.

### 290 **Author contributions**

291 N.M conceived and designed the study, performed binding ELISA, neutralization assay, analyzed data,  
292 wrote the initial manuscript, revised and finalized the manuscript. Sd.S. and S.K purified and expressed  
293 monoclonal antibodies. N.M and S.S expressed and purified recombinant proteins. T.B and N.J  
294 performed binding ELISA. S.K edited and revised the manuscript. R.A.M, S.S and K.L conceived and  
295 designed the study. K.L conceptualized and designed the study, edited, revised and finalized the  
296 manuscript.

### 297 **Funding**

298 This work was supported in part by Science and Engineering Research Board (SERB), Department of  
299 Science and Technology (DST), India (EMR/2015/001276) and Department of Biotechnology (DBT),  
300 India (BT/PR5066/MED/1582/2012).

### 301 **Competing interests**

302 The authors declare no competing interests.

### 303 **Data Availability**

304 All data required to state the conclusions in the paper are present in the paper and/or the supplementary  
305 data. Source data are provided with this paper. Additional information related to the paper, if required,  
306 can be requested from the authors.

### 307 **References**

- 308 1. Walker LM, Burton DR. 2018. Passive immunotherapy of viral infections: “super-antibodies”  
309 enter the fray. *Nat Rev Immunol* 18:297–308.
- 310 2. Kwong PD, Mascola JR. 2018. HIV-1 Vaccines Based on Antibody Identification, B Cell  
311 Ontogeny, and Epitope Structure. *Immunity* 48:855–871.

- 312 3. Sok D, Burton DR. 2018. Recent progress in broadly neutralizing antibodies to HIV. *Nat*  
313 *Immunol* 19:1179–1188.
- 314 4. Morgand M, Bouvin-Pley M, Plantier J-C, Moreau A, Alessandri E, Simon F, Pace CS, Pancera  
315 M, Ho DD, Poignard P, Bjorkman PJ, Mouquet H, Nussenzweig MC, Kwong PD, Baty D,  
316 Chames P, Braibant M, Barin F. 2016. V1/V2 Neutralizing Epitope is Conserved in Divergent  
317 Non-M Groups of HIV-1. *J Acquir Immune Defic Syndr* 71:237–245.
- 318 5. Decaro N, Lorusso A. 2020. Novel human coronavirus (SARS-CoV-2): A lesson from animal  
319 coronaviruses. *Vet Microbiol* 244:108693.
- 320 6. Hoffmann M, Kleine-Weber H, Schroeder S, Krüger N, Herrler T, Erichsen S, Schiergens TS,  
321 Herrler G, Wu N-H, Nitsche A, Müller MA, Drosten C, Pöhlmann S. 2020. SARS-CoV-2 Cell  
322 Entry Depends on ACE2 and TMPRSS2 and Is Blocked by a Clinically Proven Protease  
323 Inhibitor. *Cell* 181:271-280.e8.
- 324 7. Wrapp D, Wang N, Corbett KS, Goldsmith JA, Hsieh C-L, Abiona O, Graham BS, McLellan JS.  
325 2020. Cryo-EM structure of the 2019-nCoV spike in the prefusion conformation. *Science*  
326 367:1260–1263.
- 327 8. Impagliazzo A, Milder F, Kuipers H, Wagner MV, Zhu X, Hoffman RMB, van Meersbergen R,  
328 Huizingh J, Wanningsen P, Verspuij J, de Man M, Ding Z, Apetri A, Kükrer B, Sneekes-Vriese E,  
329 Tomkiewicz D, Laursen NS, Lee PS, Zakrzewska A, Dekking L, Tolboom J, Tettero L, van  
330 Meerten S, Yu W, Koudstaal W, Goudsmit J, Ward AB, Meijberg W, Wilson IA, Radošević K.  
331 2015. A stable trimeric influenza hemagglutinin stem as a broadly protective immunogen.  
332 *Science* 349:1301–1306.
- 333 9. Watanabe Y, Allen JD, Wrapp D, McLellan JS, Crispin M. 2020. Site-specific glycan analysis of  
334 the SARS-CoV-2 spike. *Science* 369:330–333.
- 335 10. Pinto D, Park Y-J, Beltramello M, Walls AC, Tortorici MA, Bianchi S, Jaconi S, Culap K, Zatta F,  
336 De Marco A, Peter A, Guarino B, Spreafico R, Cameroni E, Case JB, Chen RE, Havenar-  
337 Daughton C, Snell G, Telenti A, Virgin HW, Lanzavecchia A, Diamond MS, Fink K, Velesler D,

- 338 Corti D. 2020. Cross-neutralization of SARS-CoV-2 by a human monoclonal SARS-CoV  
339 antibody. *Nature* 583:290–295.
- 340 11. Zhou T, Zheng A, Baxa U, Chuang G-Y, Georgiev IS, Kong R, O’Dell S, Shahzad-UI-Hussan S,  
341 Shen C-H, Tsybovsky Y, Bailer RT, Gift SK, Louder MK, McKee K, Rawi R, Stevenson CH,  
342 Stewart-Jones GBE, Taft JD, Waltari E, Yang Y, Zhang B, Shivatare SS, Shivatare VS, Lee C-  
343 CD, Wu C-Y, NISC Comparative Sequencing Program, Mullikin JC, Bewley CA, Burton DR,  
344 Polonis VR, Shapiro L, Wong C-H, Mascola JR, Kwong PD, Wu X. 2018. A Neutralizing  
345 Antibody Recognizing Primarily N-Linked Glycan Targets the Silent Face of the HIV Envelope.  
346 *Immunity* 48:500-513.e6.
- 347 12. Gristick HB, von Boehmer L, West AP, Schamber M, Gazumyan A, Golijanin J, Seaman MS,  
348 Fätkenheuer G, Klein F, Nussenzweig MC, Bjorkman PJ. 2016. Natively glycosylated HIV-1 Env  
349 structure reveals new mode for antibody recognition of the CD4-binding site. *Nat Struct Mol Biol*  
350 23:906–915.
- 351 13. Wagh K, Kreider EF, Li Y, Barbian HJ, Learn GH, Giorgi E, Hraber PT, Decker TG, Smith AG,  
352 Gondim MV, Gillis L, Wandzilak J, Chuang G-Y, Rawi R, Cai F, Pellegrino P, Williams I,  
353 Overbaugh J, Gao F, Kwong PD, Haynes BF, Shaw GM, Borrow P, Seaman MS, Hahn BH,  
354 Korber B. 2018. Completeness of HIV-1 Envelope Glycan Shield at Transmission Determines  
355 Neutralization Breadth. *Cell Rep* 25:893-908.e7.
- 356 14. Seabright GE, Cottrell CA, van Gils MJ, D’addabbo A, Harvey DJ, Behrens A-J, Allen JD,  
357 Watanabe Y, Scaringi N, Polveroni TM, Maker A, Vasiljevic S, de Val N, Sanders RW, Ward AB,  
358 Crispin M. 2020. Networks of HIV-1 Envelope Glycans Maintain Antibody Epitopes in the Face  
359 of Glycan Additions and Deletions. *Structure* 28:897-909.e6.
- 360 15. ter Meulen J, van den Brink EN, Poon LLM, Marissen WE, Leung CSW, Cox F, Cheung CY,  
361 Bakker AQ, Bogaards JA, van Deventer E, Preiser W, Doerr HW, Chow VT, de Kruif J, Peiris  
362 JSM, Goudsmit J. 2006. Human monoclonal antibody combination against SARS coronavirus:  
363 synergy and coverage of escape mutants. *PLoS Med* 3:e237.

- 364 16. Rudicell RS, Kwon YD, Ko S-Y, Pegu A, Louder MK, Georgiev IS, Wu X, Zhu J, Boyington JC,  
365 Chen X, Shi W, Yang Z-Y, Doria-Rose NA, McKee K, O'Dell S, Schmidt SD, Chuang G-Y, Druz  
366 A, Soto C, Yang Y, Zhang B, Zhou T, Todd J-P, Lloyd KE, Eudailey J, Roberts KE, Donald BR,  
367 Bailer RT, Ledgerwood J, NISC Comparative Sequencing Program, Mullikin JC, Shapiro L,  
368 Koup RA, Graham BS, Nason MC, Connors M, Haynes BF, Rao SS, Roederer M, Kwong PD,  
369 Mascola JR, Nabel GJ. 2014. Enhanced potency of a broadly neutralizing HIV-1 antibody in vitro  
370 improves protection against lentiviral infection in vivo. *J Virol* 88:12669–12682.
- 371 17. Huang J, Kang BH, Ishida E, Zhou T, Griesman T, Sheng Z, Wu F, Doria-Rose NA, Zhang B,  
372 McKee K, O'Dell S, Chuang G-Y, Druz A, Georgiev IS, Schramm CA, Zheng A, Joyce MG,  
373 Asokan M, Ransier A, Darko S, Migueles SA, Bailer RT, Louder MK, Alam SM, Parks R, Kelsoe  
374 G, Von Holle T, Haynes BF, Douek DC, Hirsch V, Seaman MS, Shapiro L, Mascola JR, Kwong  
375 PD, Connors M. 2016. Identification of a CD4-Binding-Site Antibody to HIV that Evolved Near-  
376 Pan Neutralization Breadth. *Immunity* 45:1108–1121.
- 377 18. Makhdoomi MA, Khan L, Kumar S, Aggarwal H, Singh R, Lodha R, Singla M, Das BK, Kabra  
378 SK, Luthra K. 2017. Evolution of cross-neutralizing antibodies and mapping epitope specificity in  
379 plasma of chronic HIV-1-infected antiretroviral therapy-naïve children from India. *J Gen Virol*  
380 98:1879–1891.
- 381 19. Kumar S, Panda H, Makhdoomi MA, Mishra N, Safdari HA, Chawla H, Aggarwal H, Reddy ES,  
382 Lodha R, Kumar Kabra S, Chandele A, Dutta S, Luthra K. 2018. An HIV-1 broadly neutralizing  
383 antibody from a clade C infected pediatric elite neutralizer potently neutralizes the  
384 contemporaneous and autologous evolving viruses. *J Virol* <https://doi.org/10.1128/JVI.01495-18>.
- 385 20. Mishra N, Makhdoomi MA, Sharma S, Kumar S, Dobhal A, Kumar D, Chawla H, Singh R, Kanga  
386 U, Das BK, Lodha R, Kabra SK, Luthra K. 2019. Viral Characteristics Associated with  
387 Maintenance of Elite Neutralizing Activity in Chronically HIV-1 Clade C-Infected Monozygotic  
388 Pediatric Twins. *J Virol* 93.
- 389 21. Corti D, Misasi J, Mulangu S, Stanley DA, Kanekiyo M, Wollen S, Ploquin A, Doria-Rose NA,  
390 Staube RP, Bailey M, Shi W, Choe M, Marcus H, Thompson EA, Cagigi A, Silacci C,  
391 Fernandez-Rodriguez B, Perez L, Sallusto F, Vanzetta F, Agatic G, Cameroni E, Kisalu N,

- 392 Gordon I, Ledgerwood JE, Mascola JR, Graham BS, Muyembe-Tamfun J-J, Trefry JC,  
393 Lanzavecchia A, Sullivan NJ. 2016. Protective monotherapy against lethal Ebola virus infection  
394 by a potently neutralizing antibody. *Science* 351:1339–1342.
- 395 22. Corti D, Zhao J, Pedotti M, Simonelli L, Agnihothram S, Fett C, Fernandez-Rodriguez B,  
396 Foglierini M, Agatic G, Vanzetta F, Gopal R, Langrish CJ, Barrett NA, Sallusto F, Baric RS,  
397 Varani L, Zambon M, Perlman S, Lanzavecchia A. 2015. Prophylactic and postexposure efficacy  
398 of a potent human monoclonal antibody against MERS coronavirus. *Proc Natl Acad Sci USA*  
399 112:10473–10478.
- 400 23. Levine MM. 2019. Monoclonal Antibody Therapy for Ebola Virus Disease. *N Engl J Med*  
401 381:2365–2366.
- 402 24. Barnes CO, West AP, Huey-Tubman KE, Hoffmann MAG, Sharaf NG, Hoffman PR, Koranda N,  
403 Gristick HB, Gaebler C, Muecksch F, Lorenzi JCC, Finkin S, Hägglöf T, Hurley A, Millard KG,  
404 Weisblum Y, Schmidt F, Hatziioannou T, Bieniasz PD, Caskey M, Robbiani DF, Nussenzweig  
405 MC, Bjorkman PJ. 2020. Structures of Human Antibodies Bound to SARS-CoV-2 Spike Reveal  
406 Common Epitopes and Recurrent Features of Antibodies. *Cell* 182:828-842.e16.
- 407 25. Liu L, Wang P, Nair MS, Yu J, Rapp M, Wang Q, Luo Y, Chan JF-W, Sahi V, Figueroa A, Guo  
408 XV, Cerutti G, Bimela J, Gorman J, Zhou T, Chen Z, Yuen K-Y, Kwong PD, Sodroski JG, Yin  
409 MT, Sheng Z, Huang Y, Shapiro L, Ho DD. 2020. Potent neutralizing antibodies against multiple  
410 epitopes on SARS-CoV-2 spike. *Nature* 584:450–456.
- 411 26. Wang C, Li W, Drabek D, Okba NMA, van Haperen R, Osterhaus ADME, van Kuppeveld FJM,  
412 Haagmans BL, Grosveld F, Bosch B-J. 2020. A human monoclonal antibody blocking SARS-  
413 CoV-2 infection. *Nat Commun* 11:2251.
- 414 27. Zost SJ, Gilchuk P, Case JB, Binshtein E, Chen RE, Nkolola JP, Schäfer A, Reidy JX, Trivette  
415 A, Nargi RS, Sutton RE, Suryadevara N, Martinez DR, Williamson LE, Chen EC, Jones T, Day  
416 S, Myers L, Hassan AO, Kafai NM, Winkler ES, Fox JM, Shrihari S, Mueller BK, Meiler J,  
417 Chandrashekar A, Mercado NB, Steinhardt JJ, Ren K, Loo Y-M, Kallewaard NL, McCune BT,  
418 Keeler SP, Holtzman MJ, Barouch DH, Gralinski LE, Baric RS, Thackray LB, Diamond MS,

- 419 Carnahan RH, Crowe JE. 2020. Potently neutralizing and protective human antibodies against  
420 SARS-CoV-2. *Nature* 584:443–449.
- 421 28. Rogers TF, Zhao F, Huang D, Beutler N, Burns A, He W-T, Limbo O, Smith C, Song G, Woehl  
422 J, Yang L, Abbott RK, Callaghan S, Garcia E, Hurtado J, Parren M, Peng L, Ramirez S, Ricketts  
423 J, Ricciardi MJ, Rawlings SA, Wu NC, Yuan M, Smith DM, Nemazee D, Teijaro JR, Voss JE,  
424 Wilson IA, Andrabi R, Briney B, Landais E, Sok D, Jardine JG, Burton DR. 2020. Isolation of  
425 potent SARS-CoV-2 neutralizing antibodies and protection from disease in a small animal  
426 model. *Science* 369:956–963.
- 427 29. Malherbe DC, Wibmer CK, Nonyane M, Reed J, Sather DN, Spencer DA, Schuman JT, Guo B,  
428 Pandey S, Robins H, Park B, Fuller DH, Sacha JB, Moore PL, Hessel AJ, Haigwood NL. 2020.  
429 Rapid Induction of Multifunctional Antibodies in Rabbits and Macaques by Clade C HIV-1  
430 CAP257 Envelopes Circulating During Epitope-Specific Neutralization Breadth Development.  
431 *Front Immunol* 11:984.
- 432 30. Hessel AJ, Malherbe DC, Pissani F, McBurney S, Krebs SJ, Gomes M, Pandey S, Sutton WF,  
433 Burwitz BJ, Gray M, Robins H, Park BS, Sacha JB, LaBranche CC, Fuller DH, Montefiori DC,  
434 Stamatatos L, Sather DN, Haigwood NL. 2016. Achieving Potent Autologous Neutralizing  
435 Antibody Responses against Tier 2 HIV-1 Viruses by Strategic Selection of Envelope  
436 Immunogens. *J Immunol* 196:3064–3078.
- 437 31. Jones AT, Chamcha V, Kesavardhana S, Shen X, Beaumont D, Das R, Wyatt LS, LaBranche  
438 CC, Stanfield-Oakley S, Ferrari G, Montefiori DC, Moss B, Tomaras GD, Varadarajan R, Amara  
439 RR. 2018. A Trimeric HIV-1 Envelope gp120 Immunogen Induces Potent and Broad Anti-V1V2  
440 Loop Antibodies against HIV-1 in Rabbits and Rhesus Macaques. *J Virol* 92.
- 441 32. Havenar-Daughton C, Sarkar A, Kulp DW, Toy L, Hu X, Deresa I, Kalyuzhniy O, Kaushik K,  
442 Upadhyay AA, Menis S, Landais E, Cao L, Diedrich JK, Kumar S, Schiffner T, Reiss SM,  
443 Seumois G, Yates JR, Paulson JC, Bosinger SE, Wilson IA, Schief WR, Crotty S. 2018. The  
444 human naive B cell repertoire contains distinct subclasses for a germline-targeting HIV-1  
445 vaccine immunogen. *Sci Transl Med* 10.

- 446 33. Jardine JG, Kulp DW, Havenar-Daughton C, Sarkar A, Briney B, Sok D, Sesterhenn F, Ereño-  
447 Orbea J, Kalyuzhniy O, Deresa I, Hu X, Spencer S, Jones M, Georgeson E, Adachi Y, Kubitz M,  
448 deCamp AC, Julien J-P, Wilson IA, Burton DR, Crotty S, Schief WR. 2016. HIV-1 broadly  
449 neutralizing antibody precursor B cells revealed by germline-targeting immunogen. *Science*  
450 351:1458–1463.

451
